# Supplementary material
Source: PubMed Central journal article supplement (PMC11152250)
Supplement: NIHMS1992347-supplement-Supplementary_Table_1.pdf [file NIHMS1992347-supplement-Supplementary_Table_1.pdf]

## Supplemental Table 1 Treatment modalities among patients with resectable disease at the first 3 disease progressions

| Treatment modalities                               | First progression |                 | Second progression |                  | Third progression |                  |
|----------------------------------------------------|-------------------|-----------------|--------------------|------------------|-------------------|------------------|
|                                                    | CRS<br>(n=127)    | No CRS<br>(n=7) | CRS<br>(n=64)      | No CRS<br>(n=28) | CRS<br>(n=47)     | No CRS<br>(n=23) |
| Chemotherapy/targeted therapy regimens             |                   |                 |                    |                  |                   |                  |
| Platinum with taxane doublet                       | 45 (35)           | 3 (43)          | 16 (25)            | 5 (18)           | 7 (15)            | 1 (2)            |
| Platinum with non-taxane doublet                   | 6 (5)             | 0 (0)           | 2 (3)              | 0 (0)            | 0 (0)             | 1 (2)            |
| BEP                                                | 17 (13)           | 0 (0)           | 4 (6)              | 1 (4)            | 0 (0)             | 0 (0)            |
| Chemotherapy with bevacizumab                      | 1 (1)             | 2 (3)           | 3 (5)              | 2 (7)            | 3 (6)             | 1 (2)            |
| Other combination chemotherapy without bevacizumab | 5 (4)             | 0 (0)           | 0 (0)              | 0 (0)            | 1 (2)             | 0 (0)            |
| Single-agent bevacizumab                           | 0 (0)             | 0 (0)           | 0 (0)              | 0 (0)            | 3 (6)             | 2 (4)            |
| Single-agent chemotherapy                          | 0 (0)             | 0 (0)           | 3 (5)              | 3 (11)           | 3 (6)             | 2 (4)            |
| Other targeted therapy                             | 0 (0)             | 0 (0)           | 0 (0)              | 0 (0)            | 0 (0)             | 2 (4)            |
| Hormonal therapy                                   |                   |                 |                    |                  |                   |                  |
| Aromatase inhibitor                                | 17 (13)           | 1 (1)           | 9 (14)             | 9 (32)           | 11 (23)           | 6 (13)           |

| Treatment modalities | First progression |                 | Second progression |                  | Third progression |                  |
|----------------------|-------------------|-----------------|--------------------|------------------|-------------------|------------------|
|                      | CRS<br>(n=127)    | No CRS<br>(n=7) | CRS<br>(n=64)      | No CRS<br>(n=28) | CRS<br>(n=47)     | No CRS<br>(n=23) |
| Progesterone         | 1 (1)             | 0 (0)           | 2 (3)              | 1 (4)            | 4 (9)             | 1 (2)            |
| SERM                 | 3 (2)             | 0 (0)           | 6 (9)              | 3 (11)           | 6 (13)            | 1 (2)            |
| GnRH agonist         | 11 (9)            | 2 (3)           | 6 (9)              | 5 (18)           | 6 (13)            | 9 (19)           |
| Other                | 0 (0)             | 0 (0)           | 0 (0)              | 1 (4)            | 0 (0)             | 0 (0)            |
| None                 | 37 (29)           | 0 (0)           | 26 (41)            | 0 (0)            | 14 (30)           | 0 (0)            |

Patients may have received chemotherapy/targeted therapy followed by hormonal therapy, and therefore percentages may not add up to 100%.

**BEP**, bleomycin, etoposide, cisplatin; **CRS**, cytoreductive surgery; **GnRH**, gonadotropin-releasing hormone; **SERM**, selective estrogen receptor modulator.

*How. Serial cytoreduction in recurrent adult granulosa cell tumors. Am J Obstet Gynecol 2024.*
