# Supplementary material
Source: PubMed Central journal article supplement (PMC11152250)
Supplement: NIHMS1992347-supplement-Supplementary_Table_2.pdf [file NIHMS1992347-supplement-Supplementary_Table_2.pdf]

## Supplemental Table 2 Surgical characteristics among patients who underwent cytoreductive surgery

| Characteristic                    | Secondary CRS<br>(N=127) | Tertiary CRS<br>(N=64) | Quaternary CRS<br>(N=47) |
|-----------------------------------|--------------------------|------------------------|--------------------------|
|                                   | No. (%)                  | No. (%)                | No. (%)                  |
| Surgical approach                 |                          |                        |                          |
| Laparotomy                        | 98 (87)                  | 53 (95)                | 39 (89)                  |
| Laparoscopic                      | 10 (9)                   | 3 (5)                  | 2 (4)                    |
| Robotic                           | 5 (4)                    | 0 (0)                  | 3 (7)                    |
| Unknown                           | 14 (NA)                  | 8 (NA)                 | 3 (NA)                   |
| Procedures performed <sup>a</sup> |                          |                        |                          |
| Small/large bowel resection       | 18 (14)                  | 10 (16)                | 9 (19)                   |
| Appendectomy                      | 14 (7)                   | 3 (5)                  | 4 (9)                    |
| Pelvic lymphadenectomy            | 16 (13)                  | 2 (3)                  | 4 (9)                    |
| Para-aortic lymphadenectomy       | 9 (7)                    | 0 (0)                  | 4 (9)                    |
| Hepatic resection                 | 1 (1)                    | 4 (6)                  | 5 (11)                   |
| Omentectomy                       | 36 (28)                  | 9 (14)                 | 4 (9)                    |
| Splenectomy                       | 5 (4)                    | 2 (3)                  | 1 (2)                    |

| Characteristic     | Secondary CRS<br>(N=127) | Tertiary CRS<br>(N=64) | Quaternary CRS<br>(N=47) |
|--------------------|--------------------------|------------------------|--------------------------|
|                    | No. (%)                  | No. (%)                | No. (%)                  |
| Urinary procedures | 9 (7)                    | 5 (8)                  | 4 (9)                    |
| Tumor resection    | 127 (100)                | 64 (100)               | 47 (100)                 |
| Residual disease   |                          |                        |                          |
| R0                 | 51 (68)                  | 28 (72)                | 18 (67)                  |
| R $\leq$ 1 cm      | 19 (25)                  | 9 (23)                 | 7 (26)                   |
| R>1 cm             | 5 (7)                    | 2 (5)                  | 2 (7)                    |
| Unknown            | 52 (NA)                  | 25 (NA)                | 20 (NA)                  |

**CRS**, cytoreductive surgery; **NA**, not applicable; **R0**, no gross residual disease present at end of cytoreduction; **R $\leq$ 1**, gross residual disease  $\leq$ 1 cm present at end of cytoreduction; **R>1 cm**, gross residual disease >1 cm present at end of cytoreduction.

**How. Serial cytoreduction in recurrent adult granulosa cell tumors. Am J Obstet Gynecol 2024.**

a Percentages may not add up to 100%.
