# Supplementary material
Source: PubMed Central journal article supplement (PMC11152250)
Supplement: NIHMS1992347-supplement-Supplementary_Table_3.pdf [file NIHMS1992347-supplement-Supplementary_Table_3.pdf]

## Supplemental Table 3 Locations of residual disease among patients who underwent cytoreductive surgery

| Locations of residual disease after secondary CRS  |
|----------------------------------------------------|
| Perihepatic/hepatic                                |
| Cul-de-sac                                         |
| Para-aortic                                        |
| Small/large bowel mesentery                        |
| Locations of residual disease after tertiary CRS   |
| Liver                                              |
| Small/large bowel                                  |
| Miliary disease                                    |
| Locations of residual disease after quaternary CRS |
| Large bowel                                        |
| Miliary disease                                    |

**CRS**, cytoreductive surgery.

**How.** Serial cytoreduction in recurrent adult granulosa cell tumors. *Am J Obstet Gynecol* 2024.
